# Supplementary material for: Clostridioides difficile Toxin B PCR Cycle Threshold as a Predictor of Toxin Testing in Stool Specimens from Hospitalized Adults
Source: MDPI journal article supplement (doi:10.3390/antibiotics11050576), 2022-04-26
Supplement: s1 [file s1]

| Date       | Age | Gender | Admit category | GDH result | Toxin EIA<br>result | CCNA result | Cdiff PCR<br>tcdB Ct | Cdiff PCR<br>bin tox Ct | Cdiff PCR<br>tcdc del Ct |
|------------|-----|--------|----------------|------------|---------------------|-------------|----------------------|-------------------------|--------------------------|
| 2016/12/10 | 63  | M      | cancer         | Positive   | Negative            | Negative    | 27.9                 | 27.2                    | 0                        |
| 2016/12/10 | 60  | F      | hem malignancy | Negative   | Negative            | Negative    | 36.9                 | 0                       | 0                        |
| 2016/12/12 | 58  | F      | SOT            | Positive   | Negative            | Negative    | 25.8                 | 0                       | 0                        |
| 2016/12/14 | 35  | M      | BMT            | Positive   | Positive            | Positive    | 26.1                 | 25.8                    | 26.5                     |
| 2016/12/14 | 76  | M      | hem malignancy | Negative   | Negative            | Negative    | 36.9                 | 0                       | 0                        |
| 2016/12/16 | 54  | M      | surgery        | Positive   | Positive            | Positive    | 25.2                 | 24.1                    | 0                        |
| 2016/12/19 | 47  | F      | surgery CV     | Positive   | Negative            | Negative    | 35.5                 | 0                       | 0                        |
| 2016/12/21 | 58  | M      | SOT            | Positive   | Negative            | Positive    | 27.9                 | 0                       | 0                        |
| 2016/12/23 | 69  | F      | NS             | Positive   | Negative            | Positive    | 31.0                 | 0                       | 0                        |
| 2016/12/27 | 55  | M      | CV             | Positive   | Negative            | Positive    | 32.8                 | 0                       | 0                        |
| 2017/1/7   | 58  | M      | BMT            | Positive   | Negative            | Negative    | 30.2                 | 0                       | 0                        |
| 2017/1/12  | 43  | M      | BMT            | Positive   | Positive            | Positive    | 23.1                 | 0                       | 0                        |
| 2017/1/14  | 71  | M      | surgery GI     | Positive   | Negative            | Positive    | 24.7                 | 0                       | 0                        |
| 2017/1/18  | 33  | F      | infection      | Positive   | Negative            | Negative    | 34.6                 | 0                       | 0                        |
| 2017/1/25  | 50  | F      | cancer         | Negative   | Negative            | Negative    | 29.0                 | 0                       | 0                        |
| 2017/2/3   | 71  | F      | cancer         | Positive   | Positive            | Positive    | 25.6                 | 0                       | 0                        |
| 2017/2/3   | 61  | F      | surgery GI     | Positive   | Positive            | Positive    | 23.4                 | 25.2                    | 25.8                     |
| 2017/2/5   | 56  | F      | cancer         | Positive   | Positive            | Positive    | 22.5                 | 21.8                    | 0                        |
| 2017/2/6   | 75  | M      | GI bleed       | Positive   | Negative            | Negative    | 29.7                 | 0                       | 0                        |
| 2017/2/7   | 40  | M      | SOT            | Positive   | Negative            | Positive    | 31.9                 | 31.1                    | 32.1                     |
| 2017/2/18  | 66  | M      | cancer         | Positive   | Positive            | Positive    | 34.6                 | 34                      | 35                       |
| 2017/2/23  | 56  | F      | hem malignancy | Negative   | Negative            | Negative    | 32.6                 | 0                       | 0                        |
| 2017/2/23  | 72  | F      | infection      | Positive   | Negative            | Positive    | 32.6                 | 0                       | 0                        |
| 2017/3/7   | 60  | M      | surgery CV     | Positive   | Positive            | Positive    | 23.4                 | 0                       | 0                        |
| 2017/3/8   | 72  | M      | NS             | Positive   | Negative            | Positive    | 22.5                 | 0                       | 0.0                      |
| 2017/3/15  | 75  | F      | cancer         | Positive   | Positive            | Positive    | 25.1                 | 24.4                    | 0                        |
| 2017/3/23  | 71  | F      | cancer         | Positive   | weak pos            | Positive    | 23.9                 | 0                       | 0                        |
| 2017/3/24  | 77  | F      | GI             | Positive   | Positive            | Positive    | 21.3                 | 20.5                    | 21.4                     |
| 2017/4/7   | 55  | M      | renal failure  | Positive   | Negative            | Positive    | 32.2                 | 31.3                    | 32.3                     |
| 2017/4/18  | 70  | F      | cancer         | Positive   | Negative            | Negative    | 26.7                 | 0                       | 0                        |
| 2017/4/19  | 81  | F      | rheum          | Positive   | Negative            | Positive    | 27.2                 | 0                       | 0                        |
| 2017/4/26  | 47  | M      | cancer         | Positive   | Negative            | Positive    | 26.4                 | 0                       | 0                        |
| 2017/5/1   | 55  | F      | cancer         | Positive   | Positive            | Positive    | 23.4                 | 0                       | 0                        |
| 2017/5/2   | 66  | M      | SOT            | Positive   | Positive            | Positive    | 22.4                 | 0                       | 0                        |
| 2017/5/5   | 56  | M      | SOT            | Positive   | Negative            | Positive    | 26.3                 | 0                       | 0                        |
| 2017/5/12  | 44  | F      | pulm           | Negative   | Negative            | Negative    | 32.9                 | 0                       | 0                        |
| 2017/5/19  | 52  | M      | CV             | Positive   | Negative            | Positive    | 29.1                 | 0                       | 0                        |
| 2017/5/23  | 39  | M      | BMT            | Positive   | Negative            | Positive    | 24.6                 | 0                       | 0                        |
| 2017/5/23  | 56  | F      | cancer         | Positive   | Positive            | Positive    | 23.2                 | 0                       | 0                        |
| 2017/5/26  | 71  | M      | hem malignancy | Positive   | Negative            | Positive    | 24.3                 | 0                       | 0                        |
| 2017/5/28  | 71  | M      | cancer         | Positive   | Positive            | Positive    | 28.1                 | 27.1                    | 27.9                     |
| 2017/5/30  | 84  | F      | neoplasm       | Positive   | Negative            | Negative    | 21.4                 | 0                       | 0                        |
| 2017/6/2   | 41  | M      | BMT            | Positive   | Negative            | Positive    | 21.5                 | 0                       | 0                        |
| 2017/6/2   | 32  | M      | BMT            | Positive   | Positive            | Positive    | 24.5                 | 0                       | 0                        |
| 2017/6/3   | 39  | F      | hem malignancy | Positive   | Negative            | Positive    | 29.1                 | 30.7                    | 0                        |
| 2017/6/9   | 65  | F      | surgery GI     | Positive   | weak pos            | Positive    | 26.2                 | 0                       | 0                        |
| 2017/6/12  | 54  | M      | SOT            | Positive   | Negative            | Negative    | 27.2                 | 0                       | 0                        |
| 2017/6/13  | 63  | M      | NS             | Positive   | Positive            | Positive    | 26.0                 | 0                       | 0                        |
| 2017/6/13  | 84  | F      | renal failure  | Positive   | Positive            | Positive    | 21.3                 | 25.6                    | 0                        |

|            |    |   |                |          |          |          |      |      |      |
|------------|----|---|----------------|----------|----------|----------|------|------|------|
| 2017/6/15  | 55 | F | cancer         | Negative | Negative | Positive | 30.5 | 0    | 0    |
| 2017/6/15  | 53 | F | pulm           | Positive | Negative | Negative | 32.8 | 0    | 0    |
| 2017/6/16  | 82 | F | NS             | Positive | Positive | Positive | 20.8 | 0    | 0    |
| 2017/6/21  | 70 | F | hem malignancy | Positive | Negative | Positive | 28.2 | 0    | 0    |
| 2017/6/30  | 62 | M | GI bleed       | Positive | Positive | Positive | 25.7 | 0    | 0    |
| 2017/7/3   | 58 | F | NS             | Negative | Negative | Positive | 36.8 | 0    | 0    |
| 2017/7/3   | 60 | M | surgery GI     | Positive | Negative | Positive | 28.4 | 0    | 0    |
| 2017/7/7   | 75 | M | cancer         | Positive | Positive | Positive | 22.5 | 22.1 | 22.1 |
| 2017/7/9   | 67 | M | liver failiure | Positive | Positive | Positive | 22.8 | 22.4 | 22.6 |
| 2017/7/16  | 68 | M | NS             | Positive | Positive | Positive | 31.2 | 0    | 0    |
| 2017/7/21  | 73 | M | IBD            | Negative | Negative | Negative | 34.8 | 0    | 0    |
| 2017/7/21  | 57 | M | SOT            | Positive | Negative | Positive | 29.8 | 0    | 0    |
| 2017/7/24  | 29 | F | BMT            | Positive | Negative | Negative | 29.3 | 0    | 0    |
| 2017/7/24  | 72 | F | SOT            | Positive | Negative | Negative | 31.5 | 0    | 0    |
| 2017/7/25  | 51 | F | cancer         | Positive | Negative | Negative | 36.6 | 0    | 0    |
| 2017/7/26  | 50 | M | cancer         | Positive | Negative | Negative | 27.1 | 0    | 0    |
| 2017/8/1   | 75 | F | cancer         | Positive | Negative | Positive | 25.1 | 0    | 0    |
| 2017/8/1   | 85 | M | surgery GU     | Positive | Negative | Negative | 29.7 | 0    | 0    |
| 2017/8/4   | 80 | F | CV             | Positive | Negative | Negative | 30.3 | 0    | 0    |
| 2017/8/5   | 63 | M | cancer         | Positive | Negative | Positive | 28.5 | 0    | 0    |
| 2017/8/5   | 54 | F | NS             | Positive | weak pos | Positive | 36.3 | 0    | 0    |
| 2017/8/14  | 25 | F | BMT            | Negative | Negative | Negative | 25.3 | 0    | 0    |
| 2017/8/14  | 77 | M | cancer         | Positive | Negative | Positive | 27.1 | 0    | 0    |
| 2017/8/22  | 66 | M | cancer         | Positive | Negative | Positive | 34.9 | 0    | 0    |
| 2017/8/26  | 51 | M | CV             | Positive | Positive | Positive | 28.5 | 0    | 0    |
| 2017/8/31  | 84 | M | NS             | Positive | Negative | Positive | 26.0 | 0    | 0    |
| 2017/9/2   | 68 | F | BMT            | Positive | Negative | Positive | 31.7 | 0    | 0    |
| 2017/9/2   | 63 | F | cancer         | Negative | Negative | Negative | 34.3 | 0    | 0    |
| 2017/9/4   | 64 | M | NS             | Positive | Positive | Positive | 21.1 | 0    | 0    |
| 2017/9/5   | 56 | F | BMT            | Positive | Negative | Negative | 24.6 | 0    | 0    |
| 2017/9/6   | 38 | M | IBD            | Positive | Negative | Negative | 27.1 | 0    | 0    |
| 2017/9/20  | 48 | F | cancer         | Positive | Negative | Positive | 26.9 | 0    | 0    |
| 2017/9/25  | 62 | F | surgery GI     | Positive | Negative | Positive | 26.3 | 0    | 0    |
| 2017/9/29  | 50 | F | cancer         | Positive | Negative | Negative | 35.3 | 0    | 0    |
| 2017/9/29  | 33 | F | CV             | Positive | Negative | Positive | 31.1 | 0    | 0    |
| 2017/10/2  | 65 | F | liver failiure | Positive | Negative | Positive | 27.5 | 0    | 0    |
| 2017/10/3  | 76 | F | CV             | Positive | Positive | Positive | 23.8 | 0    | 0    |
| 2017/10/9  | 75 | F | cancer         | Negative | Negative | Negative | 35.4 | 0    | 0    |
| 2017/10/23 | 54 | M | cancer         | Positive | Negative | Positive | 36.2 | 36.1 | 36.4 |
| 2017/10/29 | 25 | M | GI             | Positive | Negative | Negative | 26.1 | 0    | 0    |
| 2017/11/3  | 72 | M | IBD            | Positive | Negative | Negative | 27.5 | 0    | 0    |
| 2017/11/12 | 74 | F | surgery GI     | Positive | Negative | Negative | 23.6 | 0    | 0    |
| 2017/11/14 | 47 | F | hem malignancy | Positive | Negative | Negative | 36.8 | 0    | 0    |
| 2017/11/17 | 59 | F | cancer         | Positive | Negative | Positive | 32.2 | 0    | 0    |
| 2017/11/20 | 54 | F | cancer         | Positive | Positive | Positive | 25.2 | 0    | 0    |
| 2017/11/21 | 24 | F | IBD            | Negative | Negative | Negative | 36.2 | 0    | 0    |
| 2017/11/27 | 45 | F | cancer         | Positive | Negative | Negative | 29.5 | 0    | 0    |
| 2017/11/29 | 70 | F | hem malignancy | Positive | Negative | Negative | 34.4 | 0    | 0    |
| 2017/12/3  | 58 | M | hem malignancy | Positive | Negative | Positive | 19.3 | 0    | 0    |
| 2017/12/18 | 31 | M | CV             | Positive | Negative | Positive | 32.9 | 0    | 0    |
| 2017/12/23 | 56 | M | SOT            | Positive | Negative | Positive | 27.1 | 0    | 0    |

|            |    |   |                |          |          |          |      |      |      |
|------------|----|---|----------------|----------|----------|----------|------|------|------|
| 2017/12/25 | 56 | F | cancer         | Positive | Positive | Positive | 22.6 | 0    | 0    |
| 2017/12/30 | 75 | M | cancer         | Negative | Negative | Negative | 32.3 | 0    | 0    |
| 2018/1/8   | 77 | F | SOT            | Positive | Negative | Positive | 32.9 | 0    | 0    |
| 2018/1/10  | 65 | M | GI bleed       | Positive | Negative | Positive | 30.1 | 29.7 | 29.7 |
| 2018/1/14  | 53 | M | liver failiure | Positive | Negative | Positive | 32.5 | 32.1 | 32.6 |
| 2018/1/17  | 39 | M | liver failiure | Positive | Positive | Positive | 27.2 | 26.9 | 26.6 |
| 2018/1/22  | 69 | F | cancer         | Positive | Negative | Negative | 35.8 | 0    | 0    |
| 2018/1/23  | 66 | F | BMT            | Positive | Negative | Negative | 32.4 | 0    | 0    |
| 2018/1/26  | 81 | M | infection      | Positive | Negative | Positive | 30.9 | 0    | 0    |
| 2018/1/29  | 56 | F | CV             | Positive | Positive | Positive | 28.0 | 0    | 0    |
| 2018/2/8   | 54 | F | surgery CV     | Positive | Negative | Positive | 25.1 | 0    | 0    |
| 2018/2/12  | 85 | M | surgery GI     | Positive | Positive | Positive | 23.8 | 24.1 | 24.6 |
| 2018/2/13  | 63 | M | liver failiure | Negative | Negative | Negative | 31.0 | 0    | 0    |
| 2018/2/15  | 47 | M | GI             | Positive | Negative | Negative | 34.5 | 0    | 0    |
| 2018/2/16  | 85 | F | cancer         | Positive | Positive | Positive | 24.6 | 24.3 | 24.4 |
| 2018/2/20  | 54 | M | surgery GI     | Positive | Positive | Positive | 26.0 | 0    | 0    |
| 2018/2/24  | 75 | M | surgery CV     | Positive | Negative | Positive | 30.6 | 29.9 | 0    |
| 2018/3/3   | 55 | F | BMT            | Positive | Negative | Negative | 29.5 | 0    | 0    |
| 2018/3/28  | 23 | F | BMT            | Positive | Negative | Positive | 28.4 | 27.8 | 28.2 |
| 2018/3/29  | 66 | F | CV             | Positive | Negative | Positive | 26.6 | 0    | 0    |
| 2018/4/1   | 79 | M | CV             | Positive | Positive | Positive | 20.8 | 20.1 | 20.5 |
| 2018/4/3   | 66 | M | CV             | Positive | Positive | Positive | 24.5 | 0    | 0    |
| 2018/4/5   | 68 | F | cancer         | Positive | Positive | Positive | 29.8 | 0    | 0    |
| 2018/4/7   | 77 | F | GI             | Positive | Negative | Positive | 33.4 | 0    | 0    |
| 2018/4/10  | 71 | F | SOT            | Positive | Positive | Positive | 23.8 | 23.7 | 23.3 |
| 2018/4/14  | 19 | M | BMT            | Positive | Negative | Positive | 25.6 | 0    | 0    |
| 2018/4/20  | 50 | F | renal failure  | Positive | Negative | Negative | 29.1 | 0    | 0    |
| 2018/4/22  | 75 | M | cancer         | Positive | Positive | Positive | 22.0 | 0    | 0    |
| 2018/4/23  | 83 | M | CV             | Positive | Positive | Positive | 30.1 | 0    | 0    |
| 2018/4/27  | 51 | M | BMT            | Positive | Positive | Positive | 23.8 | 0    | 0    |
| 2018/4/27  | 79 | F | cancer         | Positive | Positive | Positive | 27.4 | 0    | 0    |
| 2018/5/1   | 51 | F | NS             | Positive | Positive | Positive | 26.0 | 0    | 0    |
| 2018/5/2   | 68 | F | BMT            | Positive | Negative | Positive | 33.6 | 0    | 0    |
| 2018/5/4   | 59 | F | surgery GI     | Positive | Negative | Negative | 22.5 | 22   | 22.3 |
| 2018/5/6   | 79 | M | cancer         | Positive | Positive | Positive | 26.3 | 0    | 0    |
| 2018/5/6   | 33 | M | NS             | Positive | Negative | Negative | 34.6 | 0    | 0    |
| 2018/5/12  | 64 | M | cancer         | Positive | Positive | Positive | 21.3 | 0    | 0    |
| 2018/5/14  | 44 | M | BMT            | Positive | Negative | Positive | 30.8 | 0    | 0    |
| 2018/5/16  | 65 | F | cancer         | Positive | Negative | Positive | 35.1 | 0    | 0    |
| 2018/5/18  | 66 | F | cancer         | Positive | Negative | Negative | 35.4 | 0    | 0    |
| 2018/5/23  | 87 | M | cancer         | Positive | Positive | Positive | 27.8 | 27.2 | 27.3 |
| 2018/5/25  | 65 | F | GI bleed       | Negative | Negative | Negative | 32.5 | 0    | 0    |
| 2018/5/29  | 63 | F | SOT            | Positive | Negative | Positive | 23.5 | 0    | 0    |
| 2018/6/5   | 76 | F | surgery ortho  | Positive | Positive | Positive | 23.2 | 0    | 0    |
| 2018/6/9   | 77 | M | CV             | Positive | Negative | Negative | 35.4 | 34.8 | 36   |
| 2018/6/10  | 61 | M | surgery GU     | Positive | Negative | Negative | 34.0 | 0    | 0    |
| 2018/6/14  | 22 | M | IBD            | Positive | Positive | Positive | 23.2 | 0    | 0    |
| 2018/6/14  | 72 | M | SOT            | Positive | Positive | Positive | 36.1 | 35.2 | 35.4 |
| 2018/6/15  | 57 | F | cancer         | Positive | Positive | Negative | 35.0 | 0    | 0    |
| 2018/6/17  | 32 | F | NS             | Positive | Positive | Positive | 20.3 | 19.7 | 19.9 |
| 2018/6/22  | 56 | M | SOT            | Positive | Negative | Positive | 23.5 | 0    | 0    |

|            |    |   |                |          |          |          |      |      |      |
|------------|----|---|----------------|----------|----------|----------|------|------|------|
| 2018/6/25  | 37 | M | BMT            | Positive | Negative | Positive | 32.0 | 0    | 0    |
| 2018/6/30  | 66 | F | liver failiure | Positive | Negative | Positive | 29.5 | 0    | 0    |
| 2018/7/2   | 54 | F | surgery ortho  | Positive | Negative | Positive | 25.2 | 0    | 0    |
| 2018/7/10  | 31 | M | SOT            | Negative | Negative | Negative | 34.1 | 0    | 0    |
| 2018/7/13  | 81 | F | cancer         | Positive | Negative | Negative | 25.1 | 0    | 0    |
| 2018/7/15  | 65 | F | SOT            | Positive | Negative | Positive | 30.6 | 0    | 0    |
| 2018/7/17  | 64 | F | IBD            | Positive | Negative | Negative | 24.7 | 24.3 | 24.3 |
| 2018/7/19  | 65 | F | neoplasm       | Positive | Negative | Positive | 24.7 | 0    | 0    |
| 2018/7/24  | 55 | F | CV             | Positive | Positive | Positive | 23.7 | 23.2 | 23.3 |
| 2018/7/24  | 67 | M | surgery GI     | Positive | Negative | Negative | 28.5 | 0    | 0    |
| 2018/8/1   | 73 | M | surgery ortho  | Positive | Positive | Positive | 24.8 | 24.2 | 24.5 |
| 2018/8/5   | 67 | F | surgery CV     | Positive | Negative | Positive | 31.4 | 31.3 | 31.2 |
| 2018/8/6   | 55 | M | liver failiure | Positive | Negative | Positive | 34.4 | 33.4 | 0    |
| 2018/8/10  | 33 | F | surgery GI     | Positive | Negative | Negative | 25.6 | 0    | 0    |
| 2018/8/12  | 48 | F | liver failiure | Positive | Negative | Negative | 28.3 | 0    | 0    |
| 2018/8/12  | 35 | F | NS             | Negative | Negative | Positive | 32.0 | 0    | 0    |
| 2018/8/16  | 69 | F | cancer         | Negative | Negative | Positive | 34.4 | 0    | 0    |
| 2018/8/24  | 73 | M | surgery ortho  | Positive | Positive | Positive | 31.2 | 30.2 | 30.3 |
| 2018/9/6   | 70 | F | surgery        | Positive | Positive | Positive | 21.8 | 21.3 | 21.6 |
| 2018/9/12  | 66 | M | cancer         | Positive | Negative | Positive | 23.7 | 0    | 0    |
| 2018/9/14  | 93 | M | surgery GI     | Positive | Negative | Positive | 25.1 | 24.6 | 25   |
| 2018/9/17  | 67 | M | BMT            | Positive | Negative | Negative | 30.5 | 0    | 0    |
| 2018/9/19  | 67 | M | cancer         | Positive | Negative | Negative | 28.7 | 0    | 0    |
| 2018/9/30  | 60 | M | hem malignancy | Positive | Negative | Positive | 20.8 | 0    | 0    |
| 2018/10/1  | 57 | M | cancer         | Positive | Negative | Negative | 31.9 | 31.6 | 0    |
| 2018/10/7  | 77 | F | CV             | Positive | Negative | Positive | 30.6 | 0    | 0    |
| 2018/10/14 | 65 | M | liver failiure | Positive | Positive | Positive | 20.5 | 20.2 | 20.6 |
| 2018/10/14 | 53 | F | SOT            | Positive | Negative | Positive | 30.1 | 0    | 0    |
| 2018/10/16 | 47 | F | SOT            | Positive | Negative | Negative | 28.5 | 0    | 0    |
| 2018/10/17 | 50 | F | CV             | Positive | Negative | Positive | 20.1 | 0    | 0    |
| 2018/10/20 | 83 | M | cancer         | Positive | Positive | Positive | 29.2 | 0    | 0    |
| 2018/10/26 | 64 | M | SOT            | Negative | Negative | Negative | 32.9 | 0    | 0    |
| 2018/11/3  | 57 | F | hem malignancy | Positive | Negative | Positive | 33.5 | 33.1 | 33.1 |
| 2018/11/14 | 66 | M | cancer         | Positive | Positive | Positive | 25.7 | 0    | 0    |
| 2018/11/15 | 87 | M | renal failure  | Positive | Positive | Positive | 32.4 | 26.9 | 0    |
| 2018/11/15 | 60 | M | SOT            | Positive | Negative | Positive | 27.7 | 32.1 | 32.2 |
| 2018/11/17 | 47 | M | BMT            | Positive | Positive | Positive | 20.8 | 0    | 0    |
| 2018/11/19 | 52 | F | cancer         | Positive | Positive | Positive | 23.8 | 0    | 0    |
| 2018/11/19 | 65 | F | surgery ortho  | Positive | Positive | Positive | 27.4 | 27   | 26.9 |
| 2018/11/22 | 43 | M | BMT            | Positive | Negative | Negative | 34.7 | 33.5 | 33.8 |
| 2018/11/24 | 24 | M | IBD            | Positive | Positive | Positive | 21.8 | 0    | 0    |
| 2018/11/24 | 70 | F | NS             | Positive | Negative | Negative | 35.4 | 0    | 0    |
| 2018/11/29 | 76 | F | neoplasm       | Positive | Negative | Positive | 26.6 | 0    | 0    |
| 2018/12/8  | 50 | F | neoplasm       | Positive | Positive | Positive | 25.3 | 0    | 0    |
| 2018/12/8  | 66 | M | NS             | Positive | Positive | Positive | 24.8 | 0    | 0    |
| 2018/12/8  | 62 | F | surgery GU     | Positive | Negative | Negative | 24.8 | 24.4 | 0    |
| 2018/12/9  | 64 | F | BMT            | Positive | Positive | Positive | 25.6 | 0    | 0    |
| 2018/12/9  | 62 | M | liver failiure | Negative | Negative | Positive | 34.1 | 0    | 0    |
| 2018/12/10 | 38 | F | cancer         | Positive | Negative | Negative | 32.5 | 0    | 0    |
| 2018/12/12 | 57 | F | cancer         | Positive | Negative | Negative | 30.4 | 0    | 0    |
| 2018/12/19 | 64 | F | cancer         | Positive | Positive | Positive | 28.6 | 27.6 | 0    |

|            |    |   |                |          |          |          |      |      |      |
|------------|----|---|----------------|----------|----------|----------|------|------|------|
| 2018/12/22 | 28 | M | BMT            | Positive | Negative | Positive | 20.7 | 0    | 0    |
| 2018/12/24 | 70 | M | surgery CV     | Positive | Positive | Positive | 22.7 | 0    | 0    |
| 2019/1/2   | 62 | M | SOT            | Negative | Negative | Positive | 34.4 | 0    | 0    |
| 2019/1/6   | 29 | F | SOT            | Positive | Negative | Positive | 29.2 | 0    | 0    |
| 2019/1/8   | 63 | F | surgery CV     | Positive | Negative | Positive | 28.4 | 0    | 0    |
| 2019/1/11  | 70 | M | surgery CV     | Positive | Positive | Positive | 31.2 | 31.7 | 31.7 |
| 2019/1/14  | 75 | M | cancer         | Negative | Negative | Positive | 32.9 | 0    | 0    |
| 2019/1/19  | 61 | M | cancer         | Positive | Negative | Positive | 24.3 | 0    | 0    |
| 2019/1/22  | 69 | M | pulm           | Positive | Negative | Positive | 29.7 | 29.6 | 0    |
| 2019/1/25  | 40 | M | liver failiure | Positive | Positive | Positive | 28.1 | 27.6 | 27.4 |
| 2019/1/28  | 67 | F | surgery CV     | Positive | Negative | Negative | 32.4 | 0    | 0    |
| 2019/1/29  | 58 | M | surgery CV     | Positive | Positive | Positive | 26.5 | 0    | 0    |
| 2019/2/4   | 29 | F | SOT            | Positive | Negative | Negative | 23.8 | 0    | 0    |
| 2019/2/8   | 55 | F | surgery GU     | Positive | Negative | Positive | 25.8 | 0    | 0    |
| 2019/2/10  | 65 | M | hem malignancy | Positive | Positive | Positive | 25.0 | 0    | 0    |
| 2019/2/11  | 67 | M | SOT            | Positive | Negative | Positive | 22.7 | 0    | 0    |
| 2019/2/13  | 62 | M | surgery GI     | Positive | Negative | Positive | 28.9 | 28.1 | 28.2 |
| 2019/2/21  | 50 | M | surgery CV     | Positive | Negative | Positive | 28.7 | 0    | 0    |
| 2019/2/27  | 52 | F | CV             | Positive | Positive | Positive | 24.9 | 24.2 | 24.1 |
| 2019/3/2   | 60 | M | SOT            | Positive | Negative | Positive | 23.4 | 0    | 0    |
| 2019/3/8   | 82 | M | surgery GI     | Positive | Negative | Positive | 33.1 | 0    | 0    |
| 2019/3/16  | 19 | F | surgery GI     | Positive | Negative | Positive | 31.2 | 0    | 0    |
| 2019/3/17  | 79 | M | surgery GI     | Positive | Negative | Positive | 30.0 | 0    | 0    |
| 2019/3/17  | 64 | F | surgery ortho  | Positive | Negative | Positive | 20.5 | 0    | 0    |
| 2019/3/23  | 63 | F | cancer         | Positive | Negative | Positive | 30.2 | 0    | 0    |
| 2019/3/26  | 44 | F | cancer         | Negative | Negative | Negative | 35.0 | 34.7 | 0    |
| 2019/3/28  | 71 | F | SOT            | Positive | Negative | Negative | 34.4 | 0    | 0    |
| 2019/4/4   | 73 | M | IBD            | Negative | Negative | Negative | 35.1 | 0    | 0    |
| 2019/4/6   | 21 | F | IBD            | Positive | Positive | Positive | 21.1 | 0    | 0    |
| 2019/4/6   | 24 | M | SOT            | Positive | Negative | Positive | 26.0 | 0    | 0    |
| 2019/4/8   | 75 | M | cancer         | Positive | Positive | Positive | 24.1 | 0    | 0    |
| 2019/4/8   | 57 | M | SOT            | Positive | Negative | Negative | 34.7 | 0    | 0    |
| 2019/4/9   | 44 | F | cancer         | Positive | Negative | Negative | 34.3 | 34.1 | 0    |
| 2019/4/19  | 74 | M | surgery GI     | Positive | Negative | Negative | 32.3 | 0    | 0    |
| 2019/4/21  | 43 | M | surgery CV     | Positive | Negative | Positive | 23.5 | 0    | 0    |
| 2019/4/27  | 29 | M | surgery        | Positive | Negative | Positive | 23.2 | 24.7 | 0    |
| 2019/4/29  | 76 | M | surgery GI     | Positive | Negative | Positive | 27.5 | 0    | 0    |
| 2019/5/2   | 74 | M | GI             | Positive | Negative | Positive | 20.8 | 0    | 0    |
| 2019/5/6   | 29 | F | SOT            | Negative | Negative | Negative | 33.4 | 0    | 0    |
| 2019/5/23  | 66 | M | surgery CV     | Positive | Negative | Positive | 26.8 | 0    | 0    |
| 2019/5/25  | 43 | M | SOT            | Positive | Positive | Positive | 27.1 | 0    | 0    |
| 2019/6/1   | 26 | F | IBD            | Positive | Negative | Negative | 28.0 | 0    | 0    |
| 2019/6/6   | 74 | F | hem malignancy | Positive | Positive | Positive | 22.1 | 0    | 0    |
| 2019/6/8   | 38 | F | NS             | Positive | Positive | Positive | 25.2 | 0    | 0    |
| 2019/6/23  | 73 | F | cancer         | Positive | Negative | Positive | 28.1 | 27.5 | 0    |
| 2019/7/1   | 76 | M | NS             | Positive | Positive | Positive | 23.8 | 0    | 0    |
| 2019/7/5   | 79 | M | cancer         | Positive | Negative | Positive | 24.0 | 0    | 0    |
| 2019/7/16  | 41 | M | liver failiure | Positive | Negative | Positive | 32.4 | 0    | 0    |
| 2019/7/24  | 73 | F | surgery GI     | Positive | Negative | Positive | 28.7 | 0    | 0    |
| 2019/8/5   | 25 | F | SOT            | Positive | Positive | Positive | 27.6 | 0    | 0    |
| 2019/8/15  | 46 | F | cancer         | Positive | Negative | Negative | 22.4 | 0    | 0    |

|            |    |   |                |          |          |          |      |      |      |
|------------|----|---|----------------|----------|----------|----------|------|------|------|
| 2019/8/20  | 42 | F | cancer         | Positive | Negative | Positive | 28.4 | 32.3 | 31.7 |
| 2019/8/28  | 58 | F | cancer         | Positive | Positive | Positive | 23.1 | 0    | 0    |
| 2019/9/1   | 81 | M | cancer         | Positive | Negative | Negative | 29.7 | 0    | 0    |
| 2019/9/2   | 51 | M | NS             | Positive | Positive | Positive | 23.1 | 0    | 0    |
| 2019/9/3   | 72 | M | surgery GI     | Positive | Positive | Positive | 27.1 | 26.7 | 0    |
| 2019/9/5   | 62 | F | surgery CV     | Positive | Negative | Positive | 28.4 | 0    | 0    |
| 2019/9/6   | 81 | M | hem malignancy | Positive | Positive | Positive | 24.9 | 24.7 | 24.2 |
| 2019/9/7   | 75 | F | surgery CV     | Positive | Positive | Positive | 22.1 | 0    | 0    |
| 2019/9/10  | 50 | F | CV             | Positive | Negative | Positive | 25.6 | 0    | 22.7 |
| 2019/9/10  | 36 | M | SOT            | Positive | Positive | Positive | 23.3 | 0    | 0    |
| 2019/9/10  | 60 | F | SOT            | Negative | Negative | Negative | 31.2 | 0    | 0    |
| 2019/9/13  | 71 | M | cancer         | Positive | Negative | Positive | 27.3 | 0    | 0    |
| 2019/9/21  | 36 | M | SOT            | Positive | Negative | Negative | 36.8 | 0    | 37.1 |
| 2019/9/22  | 50 | F | cancer         | Positive | Positive | Positive | 35.3 | 0    | 0    |
| 2019/9/24  | 79 | M | cancer         | Positive | Positive | Positive | 29.2 | 0    | 0    |
| 2019/9/26  | 72 | M | surgery GI     | Positive | Positive | Positive | 24.3 | 23.8 | 0    |
| 2019/9/27  | 65 | F | cancer         | Positive | Negative | Positive | 30.0 | 0    | 0    |
| 2019/10/1  | 30 | F | SOT            | Positive | Negative | Positive | 27.1 | 0    | 0    |
| 2019/10/4  | 55 | F | SOT            | Positive | Negative | Negative | 35.7 | 0    | 0    |
| 2019/10/13 | 38 | M | liver failiure | Negative | Negative | Positive | 30.4 | 0    | 0    |
| 2019/10/15 | 59 | F | cancer         | Positive | Negative | Positive | 29.8 | 0    | 0    |
| 2019/10/20 | 70 | M | cancer         | Positive | Positive | Positive | 27.7 | 0    | 0    |
| 2019/10/23 | 32 | F | SOT            | Negative | Negative | Negative | 32.9 | 0    | 0    |
| 2019/10/29 | 60 | F | NS             | Positive | Positive | Positive | 28.6 | 0    | 0    |
| 2019/10/30 | 65 | F | surgery GI     | Positive | Negative | Negative | 33.7 | 0    | 0    |
| 2019/11/1  | 59 | M | cancer         | Positive | Positive | Positive | 23.2 | 0    | 0    |
| 2019/11/5  | 47 | M | SOT            | Positive | Positive | Negative | 27.9 | 0    | 0    |
| 2019/11/7  | 22 | F | rheum          | Positive | Positive | Positive | 24.5 | 0    | 0    |
| 2019/11/10 | 50 | M | SOT            | Positive | Positive | Negative | 26.1 | 0    | 0    |
| 2019/11/12 | 71 | M | SOT            | Positive | Negative | Negative | 29.8 | 0    | 0    |
| 2019/11/13 | 75 | F | surgery CV     | Positive | Negative | Negative | 30.3 | 32.5 | 34.8 |
| 2019/11/14 | 64 | M | surgery        | Positive | Positive | Positive | 25.7 | 0    | 0    |
| 2019/12/6  | 67 | M | surgery GI     | Positive | Positive | Positive | 24.8 | 0    | 0    |
| 2019/12/8  | 58 | M | NS             | Positive | Positive | Positive | 22.5 | 22.3 | 22.1 |
| 2019/12/10 | 84 | M | cancer         | Positive | Negative | Positive | 35.2 | 0    | 0    |
| 2019/12/15 | 72 | M | cancer         | Positive | Positive | Positive | 20.2 | 0    | 0    |
| 2019/12/27 | 64 | F | SOT            | Positive | Positive | Positive | 24.5 | 0    | 0    |
| 2019/12/31 | 39 | F | SOT            | Positive | Positive | Positive | 23.9 | 23.7 | 23.1 |
| 2020/1/10  | 63 | M | SOT            | Positive | Negative | Positive | 32.2 | 0    | 0    |
| 2020/1/20  | 40 | M | surgery CV     | Positive | Negative | Positive | 20.3 | 0    | 0    |
| 2020/2/5   | 55 | M | surgery CV     | Positive | Negative | Negative | 29.7 | 26.3 | 0    |
| 2020/2/6   | 49 | M | SOT            | Positive | Positive | Positive | 25.7 | 0    | 0    |
| 2020/2/7   | 64 | F | SOT            | Positive | Negative | Negative | 35.3 | 0    | 0    |
| 2020/2/8   | 23 | F | surgery GI     | Positive | Negative | Negative | 29.1 | 31.6 | 0    |
| 2020/2/9   | 80 | F | cancer         | Positive | Negative | Positive | 25.4 | 0    | 0    |
| 2020/2/10  | 38 | M | cancer         | Positive | Negative | Negative | 26.2 | 0    | 0    |
| 2020/2/10  | 78 | M | cancer         | Negative | Negative | Negative | 26.7 | 0    | 0    |
| 2020/2/18  | 65 | F | surgery CV     | Positive | Negative | Positive | 27.2 | 0    | 0    |
| 2020/2/20  | 59 | F | SOT            | Negative | Negative | Negative | 32.6 | 0    | 0    |
| 2020/2/20  | 70 | F | surgery        | Negative | Negative | Negative | 35.1 | 0    | 0    |
| 2020/2/25  | 34 | M | SOT            | Positive | Negative | Negative | 28.1 | 0    | 0    |

|           |    |   |                |          |          |          |      |      |      |
|-----------|----|---|----------------|----------|----------|----------|------|------|------|
| 2020/2/27 | 50 | F | IBD            | Positive | Positive | Positive | 23.4 | 23.1 | 23   |
| 2020/2/27 | 49 | M | liver failiure | Negative | Negative | Negative | 36.1 | 0    | 0    |
| 2020/3/1  | 49 | M | SOT            | Positive | Positive | Positive | 22.4 | 0    | 0    |
| 2020/3/1  | 42 | M | SOT            | Positive | Negative | Positive | 34.1 | 33.6 | 0    |
| 2020/3/7  | 75 | M | cancer         | Positive | Negative | Negative | 23.3 | 22.7 | 22.7 |
| 2020/3/12 | 49 | F | cancer         | Positive | Positive | Positive | 21.6 | 0    | 0    |
| 2020/3/16 | 60 | M | SOT            | Positive | Negative | Negative | 22.8 | 22.7 | 0    |
| 2020/3/17 | 24 | F | surgery GI     | Positive | Negative | Negative | 29.2 | 0    | 0    |
| 2020/3/22 | 43 | M | SOT            | Positive | Negative | Positive | 25.8 | 0    | 0    |
| 2020/3/27 | 59 | M | surgery GI     | Positive | Negative | Positive | 30.3 | 0    | 0    |
| 2020/4/2  | 66 | M | liver failiure | Positive | Positive | Positive | 21.1 | 0    | 0    |
| 2020/4/3  | 63 | M | surgery CV     | Positive | Positive | Positive | 29.3 | 0    | 0    |
| 2020/4/8  | 68 | M | infection      | Positive | Positive | Positive | 21.6 | 21.2 | 21.1 |
| 2020/4/20 | 71 | M | surgery        | Positive | Positive | Positive | 24.5 | 0    | 0    |
| 2020/4/22 | 59 | M | surgery GI     | Positive | Negative | Positive | 29.1 | 0    | 0    |
| 2020/4/26 | 83 | F | surgery        | Positive | Negative | Negative | 33.6 | 0    | 0    |
| 2020/4/27 | 79 | F | SOT            | Positive | Negative | Positive | 33.1 | 0    | 0    |
| 2020/5/1  | 54 | M | IBD            | Positive | Negative | Negative | 24.3 | 24.1 | 23.4 |
| 2020/5/6  | 43 | M | SOT            | Negative | Negative | Negative | 36.9 | 0    | 0    |
| 2020/5/9  | 64 | F | cancer         | Positive | Positive | Positive | 25.0 | 0    | 0    |
| 2020/5/13 | 54 | M | SOT            | Positive | Positive | Positive | 22.0 | 21.3 | 21.4 |
| 2020/5/18 | 80 | F | hem malignancy | Positive | Positive | Positive | 23.6 | 0    | 0    |
| 2020/5/18 | 64 | F | SOT            | Positive | Positive | Positive | 21.6 | 23.3 | 22.8 |
| 2020/5/19 | 74 | M | NS             | Positive | Positive | Positive | 23.8 | 0    | 0    |
| 2020/5/23 | 68 | F | surgery CV     | Positive | Negative | Negative | 33.1 | 0    | 0    |
| 2020/6/2  | 34 | M | cancer         | Negative | Negative | Negative | 32.8 | 0    | 0    |
| 2020/6/5  | 77 | F | surgery CV     | Positive | Negative | Negative | 29.3 | 0    | 0    |
| 2020/6/8  | 67 | F | liver failiure | Positive | Negative | Negative | 34.6 | 0    | 0    |
| 2020/6/11 | 62 | F | cancer         | Positive | Positive | Positive | 23.7 | 0    | 0    |
| 2020/6/13 | 71 | F | CV             | Positive | Negative | Positive | 20.3 | 0    | 0    |
| 2020/6/15 | 61 | F | cancer         | Positive | Negative | Positive | 32.2 | 32.5 | 0    |
| 2020/6/22 | 59 | M | SOT            | Positive | Positive | Positive | 21.8 | 21.1 | 0    |
| 2020/6/25 | 65 | F | cancer         | Positive | Negative | Positive | 34.2 | 0    | 0    |
| 2020/6/26 | 37 | M | SOT            | Positive | Positive | Positive | 24.3 | 0    | 0    |
| 2020/6/29 | 62 | F | NS             | Negative | Negative | Negative | 31.5 | 0    | 0    |
| 2020/7/1  | 70 | F | cancer         | Positive | Positive | Positive | 25.6 | 0    | 0    |
| 2020/7/8  | 71 | M | surgery        | Negative | Negative | Negative | 32.2 | 32.2 | 0    |
| 2020/7/17 | 51 | M | cancer         | Negative | Negative | Positive | 31.0 | 0    | 0    |
| 2020/7/18 | 72 | M | CV             | Positive | Positive | Positive | 24.7 | 0    | 0    |
| 2020/7/18 | 45 | M | surgery CV     | Positive | Positive | Negative | 32.1 | 0    | 0    |
| 2020/7/20 | 67 | M | SOT            | Positive | Negative | Positive | 21.8 | 0    | 0    |
| 2020/7/22 | 35 | M | SOT            | Positive | Negative | Positive | 24.6 | 0    | 0    |
| 2020/7/22 | 33 | F | SOT            | Negative | Negative | Negative | 33.9 | 0    | 0    |
| 2020/7/26 | 48 | M | cancer         | Positive | Negative | Positive | 24.9 | 0    | 0    |
| 2020/7/26 | 69 | F | SOT            | Negative | Negative | Negative | 34.9 | 0    | 0    |
| 2020/7/30 | 56 | F | surgery CV     | Positive | Negative | Negative | 25.1 | 0    | 0    |
| 2020/8/7  | 65 | F | cancer         | Positive | Negative | Positive | 27.2 | 0    | 0    |
| 2020/8/7  | 76 | M | IBD            | Positive | Negative | Positive | 26.3 | 0    | 0    |
| 2020/8/10 | 48 | M | liver failiure | Negative | Positive | Positive | 25.3 | 24.8 | 24.6 |
| 2020/8/26 | 76 | M | cancer         | Positive | Positive | Positive | 25.5 | 0    | 0    |
| 2020/8/26 | 44 | M | SOT            | Positive | Positive | Positive | 25.9 | 0    | 0    |

|            |    |   |               |          |          |          |      |      |      |
|------------|----|---|---------------|----------|----------|----------|------|------|------|
| 2020/8/26  | 48 | M | SOT           | Negative | Negative | Negative | 27.5 | 27.5 | 26.7 |
| 2020/8/28  | 72 | M | surgery ortho | Positive | Positive | Positive | 23.6 | 0    | 0    |
| 2020/8/29  | 57 | M | cancer        | Positive | Negative | Positive | 33.3 | 0    | 0    |
| 2020/9/3   | 33 | F | SOT           | Positive | Negative | Negative | 30.1 | 0    | 0    |
| 2020/9/8   | 26 | M | IBD           | Positive | Negative | Negative | 24.2 | 23.8 | 24.5 |
| 2020/9/9   | 69 | F | cancer        | Positive | Negative | Positive | 30.7 | 0    | 0    |
| 2020/9/11  | 23 | F | surgery ortho | Positive | Positive | Positive | 18.5 | 0    | 0    |
| 2020/9/26  | 67 | F | surgery CV    | Positive | Negative | Positive | 19.3 | 0    | 0    |
| 2020/9/28  | 52 | M | neoplasm      | Positive | Negative | Positive | 24.4 | 0    | 0    |
| 2020/10/3  | 66 | M | surgery CV    | Positive | Positive | Positive | 24.1 | 0    | 0    |
| 2020/10/7  | 63 | F | surgery GI    | Positive | Negative | Positive | 23.2 | 0    | 0    |
| 2020/10/8  | 56 | F | IBD           | Negative | Negative | Positive | 26.0 | 0    | 0    |
| 2020/10/12 | 59 | M | surgery GI    | Positive | Negative | Positive | 25.8 | 0    | 0    |
